# Supplementary material for: PMIF v1.0: assessing the potential of satellite observations to constrain CO 2 emissions from large cities and point sources over the globe using synthetic data
Source: Copernicus journal article supplement (doi:10.5194/gmd-13-5813-2020), 2020-11-26
Supplement: Supplementary file 2 [file gmd-13-5813-2020-supplement.zip]

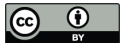

## *Supplement of*

# **PMIF v1.0: assessing the potential of satellite observations to constrain CO<sub>2</sub> emissions from large cities and point sources over the globe using synthetic data**

**Yilong Wang et al.**

*Correspondence to:* Yilong Wang ([wangyil@igsnrr.ac.cn](mailto:wangyil@igsnrr.ac.cn))

- [gmd-13-5813-2020-supplement-title-page.pdf](#)
- [PMIF\\_OneSat\\_supp\\_revise\\_notrack.pdf](#)
- [PMIF\\_code](#)
  - [CO2M\\_AnnInv.py](#)
  - [CO2M\\_AnnInv\\_SectCS.py](#)
  - [CO2M\\_Globe.py](#)
  - [README](#)
  - [check.py](#)
  - [earthcalc.py](#)
  - [job\\_AnnInv](#)
  - [job\\_AnnInv\\_SectCS](#)
  - [job\\_PMIF](#)

The copyright of individual parts of the supplement might differ from the CC BY 4.0 License.
